# Supplementary material for: Expression of MicroRNAs Is Dysregulated by HIV While Mycobacterium tuberculosis Drives Alterations of Small Nucleolar RNAs in HIV Positive Adults With Active Tuberculosis
Source: PubMed Central journal article supplement (PMC8920554; doi:10.3389/fmicb.2021.808250), 2022-02-22
Supplement: Image_3.pdf [file Image_3.pdf]

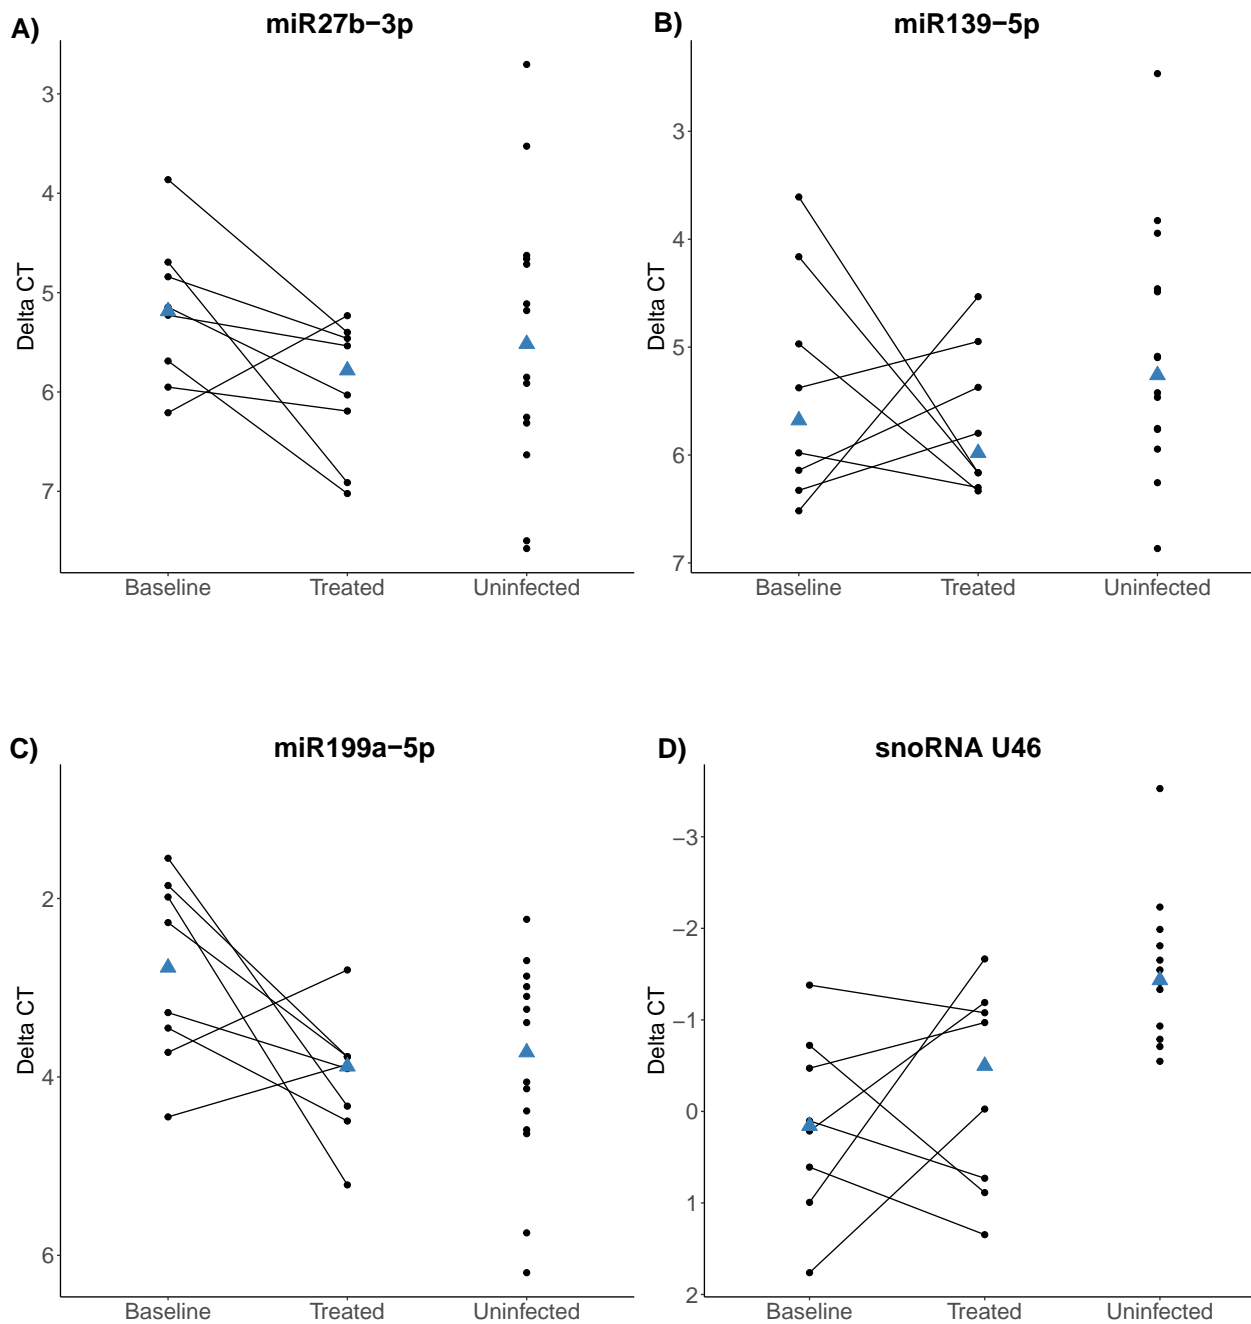

**Supplementary Figure 3.** Expression levels of A) miR-27 B) miR-139-5p C) miR-199a-5p D) snoRNA U46 in HIV-/TB+ subjects. Paired samples longitudinally followed before and during treatment connected with a line. HIV-/TB- control group included in all plots for comparison. Blue triangle indicating median value. No changes were statistically significant.
